# Serine catabolism generates NADPH to support hepatic lipogenesis

Zhaoyue Zhang<sup>1, 2\*</sup>, Tara TeSlaa<sup>2\*</sup>, Xincheng Xu<sup>1, 2</sup>, Xianfeng Zeng<sup>1, 2</sup>, Lifeng Yang<sup>2</sup>, Gang Xing<sup>3</sup>, Gregory J Tesz<sup>3</sup>, Michelle F Clasquin<sup>3</sup>, Joshua D Rabinowitz<sup>1, 2†</sup>

1. Department of Chemistry, Princeton University, Princeton, New Jersey 08544, USA

2. Lewis-Sigler Institute for Integrative Genomics, Princeton University, Princeton, New Jersey 08544, USA

3. Pfizer Inc. Internal Medicine, Cambridge, MA 02139, USA

\*Equal contribution

†Correspondence: [joshir@princeton.edu](mailto:joshir@princeton.edu)

## Summary

Carbohydrate can be converted into fat by *de novo* lipogenesis<sup>1,2</sup>. This process is known to occur in adipose and liver, and its activity is upregulated in fatty liver disease<sup>3</sup>. Chemically, *de novo* lipogenesis involves polymerization and reduction of acetyl-CoA, using NADPH as the electron donor<sup>1</sup>. While regulation of the responsible enzymes has been extensively studied, the feedstocks used to generate acetyl-CoA and NADPH remain unclear. Here we show that, while *de novo* lipogenesis in adipose is supported by glucose and its catabolism via the pentose phosphate pathway to make NADPH, liver makes fat without relying on glucose. Instead, liver derives acetyl-CoA from acetate and lactate, and NADPH from folate-mediated serine catabolism. Such NADPH generation involves the cytosolic serine pathway running in liver in the opposite direction observed in most tissues and tumors<sup>4,5</sup>, with NADPH made by the SHMT1-MTHFD1-ALDH1L1 reaction sequence. Thus, specifically in liver, folate metabolism is wired to support cytosolic NADPH production for lipogenesis. More generally, while the same enzymes are involved in fat synthesis in liver and adipose, different substrates are utilized, opening the door to tissue-specific pharmacological interventions.

## Main text

Fatty acids that can be synthesized by *de novo* lipogenesis are called non-essential. Two non-essential fatty acids are highly abundant in mammals: palmitate (C16:0; 16 carbons and zero double bonds) and oleate (C18:1). Together with the essential fatty acid linoleate (C18:2)<sup>6</sup>, these three fatty acids together account for roughly 80% body fat<sup>7</sup> (Sup. 1a,b).

To quantify their sources in mice fed standard carbohydrate-rich lab chow, we used isotope-labeled water (20% D<sub>2</sub>O)<sup>8-13</sup>. Deuterium from heavy water is stably incorporated into newly synthesized fatty acids both directly and via NADPH<sup>14</sup>. Serum labeling of saponified fatty acids, reflecting both free fatty acids and those covalently embedded in lipids and triglycerides, reached steady state with a half-time of around 1 week (Sup. 1d left), and yet more slowly in white adipose tissue (Sup. 1d right). At steady state, the fraction of each fatty acid coming from synthesis, as opposed to diet, was determined by fitting the observed mass isotopic distribution (Fig. 1a). Labeling of saponified palmitate was extensive across serum and all tissues, while, as expected, linoleate was completely unlabeled (Fig. 1b). Quantitative analysis, summing *de novo* fatty acid amounts across tissues, revealed that most fatty acids in mouse (~80%) come from diet<sup>15</sup>, but a majority of saturated fat is synthesized *de novo* (Fig. 1c). The large contribution of lipogenesis to more atherogenic saturated fat, but not healthier unsaturated fat, may contribute to negative health consequences of high carbohydrate diets and elevated *de novo* lipogenesis<sup>16,17</sup>.

A challenge in interpreting long term D<sub>2</sub>O labeling experiments is that fat can be exchanged between organs, and indeed the steady-state measurements revealed nearly indistinguishable palmitate labeling across tissues (Fig. 1b, Sup. 1e). To elucidate the organs responsible for lipogenesis, we performed 6 – 12 h infusions of D<sub>2</sub>O<sup>18</sup>. Measurements taken throughout the day at 6 h intervals showed that lipogenesis in mice occurs more rapidly in the night, when mice are more active and eat more (Sup. 1g). Overnight infusions showed greatest saponified fatty acid labeling in liver and brown adipose tissue (Fig. 1d). Only in these two tissues did labeling exceed that of circulating fat (Fig. 1d). This does not rule out the possibility of *de novo* synthesis in other tissues including white adipose, where slow fractional labeling can occur due to the large pre-existing fat pool. Nevertheless, these data show unambiguously that liver and brown adipose tissue actively engage in *de novo* lipogenesis.

Accordingly, we focused on identifying the carbon and hydrogen sources supporting palmitate synthesis in these two tissues. To this end, we infused various <sup>13</sup>C-labeled nutrients and monitored saponified

palmitate labeling (Fig. 2a). We observed a substantial contribution of glucose and lactate to lipogenesis in both liver and brown adipose (Fig. 2b, c; Sup. 2a), whereas acetate contributed strongly only in liver (Fig. 2b; Sup. 2a), indicating an important role of hepatic acetyl-CoA synthetase 2 (ACSS2)<sup>19,20</sup> which has been proved important in tumor lipogenesis<sup>21,22</sup>. The relative contribution of glucose and lactate differed between liver and brown adipose, with lactate contributing more in liver and glucose more in adipose (Fig. 2b, c, d). Because glucose and lactate interconvert via glycolysis and gluconeogenesis, infusion of either substrate labels both in the circulation<sup>18</sup> (Fig. 2a; Sup. 2b, c). Accordingly, even if only one of the substrates is used by a tissue to drive lipogenesis, we will observe labeling from infusion of either substrate. By monitoring the extent of tissue palmitate labeling from infusion of each substrate, as well as the extent of cross-labeling between the substrates, the direct contribution of each substrate can be determined by a linear algebra calculation<sup>18</sup>. This analysis revealed that, while glucose and lactate make similar contributions to brown adipose lipogenesis, the contribution of glucose to hepatic lipogenesis is via circulating lactate<sup>18,23</sup> (Fig. 2e). Importantly, there is no discernible direct circulating glucose contribution to liver fat synthesis (Fig. 2e).

Much of the energy in fatty acids comes from NADPH<sup>1</sup>, which donates hydrogen to drive acetyl reduction. The canonical cytosolic NADPH production route is the oxidative pentose phosphate pathway (oxPPP)<sup>1,24,25</sup>. Flux from the oxPPP into NADPH's redox active hydrogen can be traced using glucose deuterated at C1 or C3 (Fig. 3a). Such labeling can be read out in NADPH itself or in downstream products, such as newly synthesized fatty acids. In prior work in cultured cancer cells, we found that NADPH deuterium labeling from the oxPPP is incomplete<sup>26</sup>, but that reflects Flavin enzyme-mediated exchange of NADPH's active hydrogen with water rather than alternative NADPH sources<sup>14</sup>. Correcting for such exchange, which can be monitored using D<sub>2</sub>O, revealed that the oxPPP is the main cytosolic NADPH source in most cultured cancer cells<sup>2,25,27</sup>. Whether non-transformed lipogenic cells mainly use the oxPPP to generate NADPH remains unclear.

To investigate the NADPH sources supporting hepatic lipogenesis, we began by studying cultured primary hepatocytes. Both liver and primary hepatocytes only weakly express oxPPP enzymes<sup>28</sup>. Consistent with this, the absolute oxPPP flux in primary mouse hepatocytes (determined based on radioactive CO<sub>2</sub> release from [1-<sup>14</sup>C]glucose) (Sup. 3a) was undetectable, despite strong flux in hepG2 cells (Sup. 3b, c). Moreover, in contrast to hepG2 cells, in primary hepatocytes, we observed almost no NADPH and fat labeling from [3-<sup>2</sup>H]glucose, suggesting the predominance of alternative NADPH production pathways<sup>29</sup> (Sup. 3d, e).

Multiple studies have identified isocitrate dehydrogenase 1 (IDH1) and malic enzyme 1 (ME1) as important cytosolic NADPH producers in lipogenic cells<sup>29,30</sup>. Consistent with this, lysates of primary hepatocytes showed substantial ME1 and especially IDH1 activity (Sup. 3g). In addition, [U-<sup>2</sup>H]glutamine labeled the redox-active hydrogen of NADPH and downstream fat, reflecting cytosolic NADPH production from ME1 and/or IDH1 (Sup. 3d, e). Nevertheless, even after correcting for hydrogen-deuterium exchange based on experiments with D<sub>2</sub>O, the combined contribution of the oxPPP, malic enzyme, and IDH in primary hepatocytes was less than 50% (Sup. 3h).

Serine catabolism is a potential alternative NADPH source, which drives mitochondrial NADPH production for redox defense during cancer metastasis<sup>31</sup>. To date, however, serine catabolism has not been shown to be a physiologically relevant contributor to cytosolic NADPH. We explored whether serine might contribute to NADPH production in primary hepatocytes. Surprisingly, we observed NADPH and downstream fat labeling from [2,3,3-<sup>2</sup>H]serine (Sup. 3d, e).

We attempted to translate the <sup>2</sup>H-tracing technology *in vivo*, infusing mice with the oxPPP tracer [1-<sup>2</sup>H]glucose overnight. Strikingly, we observed strong labeling of brown adipose palmitate (Fig. 3b), confirming the effectiveness of this tracing strategy. After correcting for the fraction of NADPH's active hydrogen exchanged with water and the extent of tissue glucose labeling (Fig. 3c), we found that the oxPPP accounts for nearly all brown fat NADPH production (Fig. 3g right). Liver fat was not labeled, however, indicating that liver relies on alternative NADPH sources (Fig. 3b, c).

To identify the source of liver NADPH, we attempted *in vivo* [U-<sup>2</sup>H]glutamine infusion to probe malic enzyme and IDH. Unfortunately, there was extensive deuterium loss between glutamine and malate/isocitrate, rendering the resulting lack of labeling in palmitate relatively uninformative (Sup. 3j, k). The successful tracing with [U-<sup>2</sup>H] glutamine in cultured hepatocytes but not *in vivo* also reflects glutamine being the predominant hepatocytes TCA substrate *in vitro* but not *in vivo*<sup>32</sup> (Sup. 3i). Alternative approaches to label the relevant hydrogen atoms of malate and isocitrate were unsuccessful even in cultured hepatocytes (Sup. 3l).

Accordingly, we turned our attention to serine. Infusion of [2,3,3-<sup>2</sup>H]serine did not detectably label palmitate in brown fat. Impressively, however, we obtained substantial labeling in both NADPH itself and palmitate in liver (Fig. 3e, f).

We next sought to determine the pathway linking serine to NADPH and liver fat synthesis, hypothesizing folate-mediated cytosolic serine catabolism via the SHMT1-MTHFD1-ALDH1L1 reaction sequence<sup>26</sup>. Both

MTHFD1 and ALDH1L1 are capable of making NADPH, although neither had been shown to do so in a physiological context previously<sup>33</sup>. Indeed, in most cells, MTHFD1 runs in the NADPH-consuming direction<sup>34</sup>. To assess the direction of one-carbon flux *in vivo*, following [2,3,3-<sup>2</sup>H]serine infusion, we monitored the labeling of 5-methyl-THF. Serine catabolism in mitochondria, followed by re-assimilation of the resulting formate in the cytosol, results in M+1 5-methyl-THF and consumes cytosolic NADPH. In contrast, cytosolic serine catabolism generates M+2 5-methyl-THF and can support cytosolic NADPH production<sup>35</sup>(Fig. 4a). We observed a predominance of M+1 5-methyl-THF in most tissues, but a strong M+2 5-methyl-THF signal specifically in liver, consistent with hepatic one-carbon metabolism producing cytosolic NADPH (Fig. 4b, Sup. 4a).

To confirm that the observed NADPH and fatty acid labeling in liver is derived from cytosolic serine catabolism, we carried out [2,3,3-<sup>2</sup>H]serine tracing in SHMT1 whole-body knock-out mice, which are viable, fertile, and exhibit no major metabolic defects<sup>33,36</sup>. These mice showed a complete loss of M+2 5-methyl-THF (Fig. 4c), confirming functional ablation of SHMT1 enzymatic activity. We also observed an 80% drop in NADPH and palmitate labeling from serine (Fig. 4d, e; Sup. 4c). Thus, SHMT1-driven serine catabolism is a substantial NADPH source for hepatic lipogenesis.

In the absence of SHMT1, folate metabolism can contribute to hepatic NADPH production via ALDH1L1, which can oxidize formyl-THF<sup>37</sup>. Serine can contribute to cytosolic formyl-THF either via SHMT1-MTHFD1 or via the mitochondrial enzymes SHMT2-MTHFD2-MTHFD1L<sup>38-40</sup>. To probe the significance of ALDH1L1, we carried out tracer studies with [<sup>2</sup>H]formate, observing substantial NADPH and fat labeling, although less than that from deuterated serine (Sup. 5c, e). Thus, both the SHMT1-MTHFD1 reaction sequence, and downstream ALDH1L1 which can also be fed via the SHMT2 pathway, contribute to serine-driven hepatic NADPH production.

To more completely inhibit serine's hepatic NADPH contribution, we used a pharmacological inhibitor of SHMT1/2, SHIN2, a variant of SHIN1 with improved pharmacokinetics<sup>35</sup>. Treatment with SHIN2 markedly decreased both NADPH and palmitate labeling from [2, 3, 3-<sup>2</sup>H]serine in liver (Fig. 4d, e). Labeling from [<sup>2</sup>H]formate, which feeds directly into the formyl-THF pool<sup>37</sup> and can generate cytosolic NADPH via ALDH1L1 was maintained (Sup. 4e).

Finally, we assessed whether manipulation of serine-driven NADPH production could impact the overall rate of hepatic lipogenesis. D<sub>2</sub>O tracing revealed that both SHMT1 knockout and pharmacological SHMT1/2 inhibition significantly decreased hepatic but not brown adipose fat synthesis (Fig. 4f). Thus,

alternative pathways like malic enzyme are insufficient to compensate fully for blockade of serine catabolism, rendering serine catabolism a functionally important driver of hepatic lipogenesis.

One-carbon metabolism is important for organismal development and as a target for cancer therapy and autoimmune disease treatment<sup>4,41-43</sup>. Genetic impairment of mitochondrial serine catabolism (e.g. via knockout of *SHMT2*, *MTHFD2*, or *MTHFD1L*) results in developmental hallmarks of folate deficiency such as neural tube defects<sup>36</sup>. In cancer cells or T cells, loss of the mitochondrial 1C pathway impairs growth and proliferation<sup>5,31,34,44</sup>. In contrast, *SHMT1* loss is tolerated in both development and proliferating cells, rendering the physiological function of cytosolic serine catabolism a long-standing puzzle<sup>36</sup>. The present data show that, while most tissues generate 1C units from serine via the mitochondrial pathway, the liver uniquely relies on cytosolic serine catabolism. Flux running from serine through *SHMT1*-*MTHFD1*-*ALDH1L1*, net generates glycine, CO<sub>2</sub>, and 2 NADPH which support hepatic lipogenesis.

Fatty acid synthesis is a target of interest for treating cancer<sup>45</sup> and non-alcoholic fatty liver disease<sup>46</sup>. To date, drug development efforts have focused on the core fatty acid biosynthetic enzymes, acetyl-CoA carboxylase (*ACC1*) and fatty acid synthase (*FAS*)<sup>46</sup>, which are required for fat synthesis across tissue types and tumors. *ACC1* inhibitors have proven effective in decreasing lipogenesis but cause hypertriglyceridemia in both rodents and humans<sup>47,48</sup>. While the mechanism underlying the hypertriglyceridemia remains unclear, a concern with general lipogenesis inhibition is that excess carbon must ultimately be safely stored.

The physiological location for long-term carbon storage is adipose<sup>49,50</sup>. Accordingly, it is conceptually appealing to selectively block lipogenesis in liver, while retaining adipose lipogenesis. The present data show that acetate is a liver-specific lipogenic carbon source, and serine catabolism is a liver-specific cytosolic NADPH source. The associated dependency of hepatic but not adipose lipogenesis on *ACSS2* and *SHMT1* offers a potential strategy to inhibit selectively hepatic lipogenesis.

## Methods

### Human adipose tissue samples

De-identified human fat samples were the generous gift of Prof. Raymond Soccio and the Human Metabolic Tissue Bank of the University of Pennsylvania Institute for Diabetes, Obesity, and Metabolism.<sup>51</sup>

### Mouse experiments

Mouse work was approved by the Princeton University Institute Animal Care and Use Committee. Mice were housed under normal light cycle (lights on 8:00-20:00) and fed standard chow diet *ad lib* (PicoLab Rodent 20 5053 laboratory Diet St. Louis, MO). Eight-week-old wild type C57BL/6 mice were purchased from Charles River Laboratories. Mice were allowed at least 5 days of acclimation to the facilities prior to experimentation and were randomly chosen for different experimental conditions. No blinding was implemented. Drinking water experiments started one week after arrival and lasted for 4 weeks, with tail vein blood for circulating fatty acid labeling collected weekly.

Intravenous tracer infusions were done on mice after in-house right jugular vein catheterization. Mice were 10-16 weeks old at the time of isotope infusion measurements. Unless otherwise indicated, infusions were performed during the dark cycle from 20:00 to 8:00 +1 day, during which time the mice are more active, feed more, and synthesize more fat. Tail vein blood was collected prior to sacrifice to measure circulating labeling. Blood samples were kept on ice to coagulate and then centrifuged at 4°C to separate serum. Thereafter, mice were anesthetized with isoflurane, opened, and resected. The portal vein was cut, and portal blood was taken with pipet. Then 12 tissues were collected in the following order: liver, spleen, pancreas, kidney, small intestine, perigonadal white adipose tissue, inguinal white adipose tissue, quadriceps, lung, heart, brown adipose tissue, and brain. All tissues were immediately clamped between liquid nitrogen temperature metal plates. After tissue collection, mice were sacrificed by cervical dislocation.

### SHMT1 knockout mice and pharmacological SHMT inhibition

The whole-body  $\Delta$ SHMT1 mice were a generous gift from Prof. Patrick J. Stover<sup>36</sup> and bred at Princeton as heterozygotes. Homozygotes knockout progenies and littermate wild-type control mice were used in experiments. The small molecule SHMT inhibitor SHIN2 was mixed with cyclodextrin. Drug or vehicle

control was intravenously infused together with tracers through jugular vein for 12 h (20:00-8:00 +1 day) (40 mg/kg of total drug over 12 h, 3.33mg/kg/h). In tracing experiments, no significant differences were observed among true wild type, littermate control and vehicle control mice.

### **Primary hepatocyte collection and cell culture**

Primary hepatocytes were isolated from wild type C57BL/6 mice<sup>52</sup> and cultured in high glucose (4.5g/L) DMEM medium supplied with 1% Pen Strep, 100 nM insulin, 100 nM dexamethasone, and 1% glutamax. Primary hepatocytes were cultured in collagen-coated 6-well plates in 37°C, 5% CO<sub>2</sub> incubator. HepG2 cells were obtained from ATCC and cultured in DMEM with 10% FBS. For labeling experiments, primary hepatocytes were isolated, cultured overnight, and used the next morning. For isotope labeling experiments, hepG2 cells were changed into the same condition as primary hepatocytes 24 h prior to start of tracing. Medium was aspirated and replaced with otherwise identical pre-warmed medium containing the indicated isotope tracer in place of the corresponding unlabeled nutrient. Duration of labeling was 2.5 h for soluble metabolite measurement and 6 h for fat measurement. To harvest metabolites, media was aspirated and 500 µL -20 °C 40:40:20 methanol: acetonitrile: water with 0.5% formic acid was directly added, then neutralized immediately with 15% NH<sub>4</sub>HCO<sub>3</sub> solution (2.2% v/v of extraction buffer). Cells were collected with a scraper and transferred together with extraction buffer into a 1.5ml vial on dry ice. Samples were incubated on dry ice for 1-1.5 h then thawed on ice and centrifuged at 4°C, 16,000 x g for 10 min. Supernatant was directly analyzed by LC-MS without any washing steps.

### **Enzymatic activity assays**

A diaphorase-resazurin-coupled biochemical assay was used to detect G6PD, IDH1, ME1 enzyme activity in cell lysates. Cytosolic proteins were isolated by subcellular protein fractionation kit (Thermo, 78840). 2% v/v of cytosolic lysate was mixed with buffer (50 mM Tris pH = 7.4, 5 mM MgCl<sub>2</sub>, 1 mM resazurin, 0.25 mM NADP<sup>+</sup>, 0.1 U mL<sup>-1</sup> diaphorase and 0.1 mg mL<sup>-1</sup> bovine serum albumin). To this mixture, substrate (glucose-6-phosphate for G6PD, isocitrate for IDH1 and malate for ME1) was added to a final concentration of 1 mM to initiate reactions. The kinetics of NADPH production were recorded by relative fluorescent unit measurement using a plate reader. The excitation wavelength was 540 nm and emission wavelength 590 nm.

### **Radioactive CO<sub>2</sub> release from oxPPP pathway**



$^{14}\text{CO}_2$  release from [1- $^{14}\text{C}$ ]glucose and [6- $^{14}\text{C}$ ]glucose was used to measure oxPPP flux as previously described<sup>2,26</sup>. Briefly, cells were grown in rubber stopper-sealed tissue culture flasks with DMEM containing 0.5  $\mu\text{Ci mL}^{-1}$  [1- $^{14}\text{C}$ ]glucose or [6- $^{14}\text{C}$ ]glucose. 150  $\mu\text{L}$  of 10 M KOH was added to a center well (Kimble Chase) containing a piece of filter paper. After 16 h, cell metabolism was quenched, and  $\text{CO}_2$  was released by injecting 1 mL 3 M acetic acid through the stopper. Everything in the center well was transferred into a scintillation vial for counting. Absolute flux was calculated as previously described<sup>2,26</sup>.

### LC-MS sample preparation

Tissue samples were stored at  $\leq -70^\circ\text{C}$ . Tissues were pulverized using a Cryomill (Retsch). 10-20 mg of the resulting powder was weighed into a pre-cooled tube for extraction.

Soluble metabolites extraction was done by adding  $-20^\circ\text{C}$  40:40:20 methanol: acetonitrile: water with 0.5% formic acid to the resulting powder (40  $\mu\text{L}$  solvent/mg tissue) and the samples were first vortexed for 5 s and then neutralized immediately with 15%  $\text{NH}_4\text{HCO}_3$  solution (2.2% v/v of extraction buffer). All samples were then vortexed again for 10 s, incubated at  $-80^\circ\text{C}$  for 1 – 1.5 h, thawed on ice and then centrifuged at  $4^\circ\text{C}$ , 16,000 x g for 10 min. Supernatant was transferred to LC-MS vials for analysis. The acid and associated neutralization are important for NAD(P)(H) measurement and were omitted for  $^{13}\text{C}$ -labeled samples where NAD(P)(H) measurement was not the focus.

Saponified fatty acid extraction of tissue was done by adding 1 mL of 0.3 M KOH in 90:10 MeOH/ $\text{H}_2\text{O}$  to the weighed tissue powder. After transferring the resulting mixture to a 4 mL glass vial, saponification was done at  $80^\circ\text{C}$  in water bath for 1 h. Then samples were cooled to room temperature, neutralized with 100  $\mu\text{L}$  pure formic acid and extracted with 1 mL of hexane. The hexane layer was transferred to another glass vial, dried down under  $\text{N}_2$ , and resuspended in 1:1 methanol: acetonitrile (100  $\mu\text{L}$ /mg tissue; 40  $\mu\text{L}$ /mg serum) for LC-MS analysis.

Serum samples were collected by centrifuging blood at 16,000 x g at  $4^\circ\text{C}$  for 10 min. Then serum was extracted as above for both water soluble metabolites (final volume: 30  $\mu\text{L}$  40:40:20 methanol: acetonitrile: water per 1  $\mu\text{L}$  serum) and saponified fatty acids (final volume: 40  $\mu\text{L}$  1:1 methanol: acetonitrile per 1  $\mu\text{L}$  serum).

Acetate labeling in serum was measured with a derivatization method: 5  $\mu\text{L}$  serum was added into 100  $\mu\text{L}$  of a mixture of 12 mM 1-ethyl-3-(3-dimethylaminopropyl)carbodiimide (EDC), 15 mM 3-nitrophenylhydrazine, and pyridine (2% v/v) in methanol, incubated at  $4^\circ\text{C}$  for 1 h, and centrifuged for

10 min at 16,000 × g. Then the mixture was quenched with 0.5 mM beta-mercaptothion and 0.1% formic acid in water and directly analyzed by LC-MS analysis<sup>53</sup>.

Folate species were also measured by a derivatization method<sup>54</sup>. 20 mg of tissue was extracted with 1 mL of 1:1 MeOH:H<sub>2</sub>O with sodium ascorbate (25 mM) and NH<sub>4</sub>OAc (25 mM). Precipitates were pelleted by centrifugation (16,000 × g, 10 min). The supernatants were dried down under N<sub>2</sub> and resuspended in 450 µL of H<sub>2</sub>O with ascorbic acid (30 mM), dipotassium phosphate (50 mM) and 2-mercaptoethanol (0.5%). 25 µL of charcoal-treated rat serum was added to each sample, and the resulting sample was incubated at 37°C for 2 h. Samples were cleaned by Bond Elut PH columns (Agilent Technologies). Columns were washed with 1 mL of MeOH and conditioned with 1 mL of ascorbic acid buffer (30 mM ascorbic acid, 25 mM NH<sub>4</sub>OAc in water). Samples were adjusted to pH 4 using formic acid and were loaded onto the columns. Each column was then washed with 1 mL of the ascorbic acid buffer. Folate species were eluted with 400 µL of 1:1 MeOH:H<sub>2</sub>O with 2-mercaptoethanol (0.5% v/v) and NH<sub>4</sub>OAc (25 mM). The eluate was dried down under N<sub>2</sub>, resuspended in HPLC H<sub>2</sub>O, centrifuged (16,000 × g, 5 minutes), and analyzed by LC-MS.

#### **LC-MS method for metabolites measurement**

LC-MS analysis for soluble metabolites was achieved on the Q Exactive PLUS hybrid quadrupole-orbitrap mass spectrometer (Thermo Scientific) coupled with hydrophilic interaction chromatography (HILIC)<sup>14</sup>. To perform the LC separation of <sup>13</sup>C-labeled tissue samples, cultured cell samples and all serum samples, an XBridge BEH Amide column (150 mm × 2.1 mm, 2.5 µM particle size, Waters, Milford, MA) was used with a gradient of solvent A (95%:5% H<sub>2</sub>O : acetonitrile with 20 mM ammonium acetate, 20 mM ammonium hydroxide, pH 9.4), and solvent B (100% acetonitrile). The gradient was 0 min, 85% B; 2 min, 85% B; 3 min, 80% B; 5 min, 80% B; 6 min, 75% B; 7 min, 75% B; 8 min, 70% B; 9 min, 70% B; 10 min, 50% B; 12 min, 50% B; 13 min, 25% B; 16 min, 25% B; 18 min, 0% B; 23 min, 0% B; 24 min, 85% B; 30 min, 85% B. The flow rate was 150 µL/min; the injection volume was 10 µL; the column temperature was 25 °C. MS full scans were in negative ion mode with a resolution of 140,000 at m/z 200 and scan range of 75 – 1000 m/z. The automatic gain control (AGC) target was 1 × 10<sup>6</sup>.

Deuterium labeled tissue samples and cultured cell samples are analyzed by an almost identical method with modified gradient and a targeted NADP(H) scan. The gradient was: 0 min, 85% B; 2 min, 85% B; 3 min, 60% B; 9 min, 60% B; 9.5 min, 35% B; 13 min, 5% B; 15.5 min, 5% B; 16 min, 85% B, 20 mins stop

run, and the injection volume was 15  $\mu\text{L}$ . Full scans as above were alternated with targeted scans:  $m/z$  640-765 with a resolution of 35,000 at  $m/z=200$  (AGC target  $5 \times 10^5$ ).

To analyze serum acetate, we also used the Q Exactive PLUS hybrid quadrupole-orbitrap mass spectrometer. LC separation was on a reversed phase column (Acquity UPLC BEH C18 column, 2.1 mm x 100 mm, 1.7  $\mu\text{m}$  particle size, 130 Å pore size; Waters, Milford, MA) using a gradient of solvent A (water), solvent B (methanol): 0 min, 10% B; 1 min, 10% B; 5 min, 30% B; 7 min, 100% B; 11 min, 100% B; 11.5 min, 10% B; 14 min, 10% B. Flow rate was 200  $\mu\text{L}/\text{min}$  and column temperature was 60°C with an injection volume of 10  $\mu\text{L}$ <sup>53</sup>. MS scans were in negative ion mode with a resolution of 15,000 at  $m/z$  200 and scan range of 100-300  $m/z$ . The automatic gain control (AGC) target was  $1 \times 10^6$ .

To analyze folates<sup>54</sup>, we again used the Q Exactive PLUS hybrid quadrupole-orbitrap mass spectrometer. LC separation was on a different reversed phase column (Agilent InfinityLab Poroshell 120 Bonus-RP 2.7  $\mu\text{m}$ , 2.1 x 150 mm) with a gradient of solvent A (1% vol of 1M  $\text{NH}_4\text{OAc}$  and 0.1% vol of glacial acetic acid), solvent B (acetonitrile): 4 min, 80% B; 10 min, 2% B; 6 min, 30% B; 11min, 100% B; 15 min, 100% B; 16min, 2% B; 20min 2% B. The flow rate was 200  $\mu\text{L}/\text{min}$  and the column temperature was 25°C with an injection volume of 20  $\mu\text{L}$ . MS scans were in negative ion mode with a resolution of 35,000 at  $m/z$  200 and scan range of 350-1000  $m/z$ . The automatic gain control (AGC) target was  $1 \times 10^6$ .

To analyze fatty acids, we used an Exactive orbitrap mass spectrometer. LC separation was via reversed phase-ion-pairing chromatography on a Luna C8 column (150 x 2.0 mm<sup>2</sup>, 3  $\mu\text{M}$  particle size, 100 Å pore size; Phenomenex) with a gradient of solvent A (10 mM tributylamine + 15 mM acetic acid in 97:3  $\text{H}_2\text{O}:\text{MeOH}$ , pH 4.5), solvent B (MeOH): 0 min 80% B; 10 min, 90% B; 11 min, 99% B; 25 min, 99% B; 26 min, 80% B; 30min, 80% B. The flow rate was 250  $\mu\text{L}/\text{min}$  and column temperature 25 °C with an injection volume of 5  $\mu\text{L}$ . The MS scans were in negative ion mode with a resolution of 100,000 at  $m/z$  200 and scan range of 120-600. The AGC target was at high dynamic range.

All data from labeling experiments were analyzed by EI-MAVEN<sup>55</sup> and subjected to natural abundance correction<sup>56</sup>.

## Data analysis

### 1. Quantification of *de novo* lipogenesis flux with $\text{D}_2\text{O}$

#### 1) Long-term steady-state analysis with oral $\text{D}_2\text{O}$

$\text{D}_2\text{O}$  labels lipogenic fat both directly and via NADPH. Accordingly, a double binomial distribution model was used to calculate the palmitate labeling pattern based on experimentally measured  $\text{D}_2\text{O}$  and NADPH

labeling<sup>14</sup>. Fractional D<sub>2</sub>O enrichment *in vivo*  $p_1$  was determined based on labeling of soluble metabolites pairs (malate-fumarate; glutamate-ketoglutarate). NADPH active-H labeling  $p_2$  was based on the NADPH-NADP<sup>+</sup> pair:

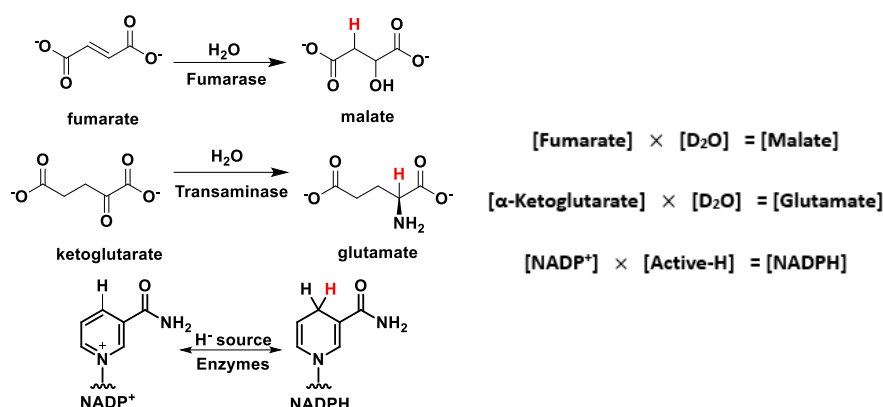

$$\begin{bmatrix} M+0 & 0 \\ M+1 & M+0 \\ \vdots & M+1 \\ M+i & \vdots \\ 0 & M+i \end{bmatrix} \times \begin{bmatrix} 1-p \\ p \end{bmatrix} = \begin{bmatrix} M+0 \\ M+1 \\ \vdots \\ M+i \\ M+i+1 \end{bmatrix}$$

(1)

In the above equation, the matrix on the left-hand side contains the experimentally measured mass isotope distribution for the compound on the left-hand side in the equations in the above schematic (the same compound's mass isotope distribution is in both columns, offset as indicated). The matrix on the right-hand side contains the experimentally measured mass isotope distribution for the compound on the right-hand side in the above equations. The value of  $p$  is determined by solving the resulting linear equations. Values of  $p_1$  are the average of  $p$  determined using fumarate-malate and  $\alpha$ -ketoglutarate-glutamate;  $p_2$  is solely determined by NADP-NADPH.

For the infusion of other deuterium tracers (1-[<sup>2</sup>H]glucose and [2,3,3-<sup>2</sup>H]-serine), NADPH active-H labeling is also calculated by eq 1.

Synthesis of one palmitate molecule (C16:0) requires 7 repeated reactions that incorporate 7 hydrogens from water and 14 hydrogens from NADPH. The expected ( $E$ ) number of deuterium in one palmitate is

$$E = 7 \times p_1 + 14 \times p_2 \quad (2)$$

Let  $M_i$  be the fraction of palmitate containing  $i$  deuterium atoms (i.e. measured fraction at mass  $M + i$  after correcting for natural isotope abundance). Then  $D$  is the average measured number of deuterium accumulated at steady state per palmitate

$$D = \sum_{i=0} M_i \times i \quad (3)$$

Define:

$F$  = *de novo* lipogenic fatty acid (palmitate) amount at steady state

$C$  = total fatty acid (palmitate) amount

$F/C$  = fraction palmitate synthesized *de novo*

The total deuterium assimilated is given by both (i) total fatty acid amount ( $C$ ) x measured average deuterium per fatty acid ( $D$ ) and (ii) newly synthesized fatty acid amount (to be determined) x expected deuterium per newly synthesized fatty acid ( $E$ ):

$$C \times D = F \times E$$

$$\text{Fractional newly synthesized fatty acid at steady state} = \frac{F}{C} = \frac{D}{E} \quad (4)$$

## 2) Kinetic analysis of *de novo* lipogenesis with D<sub>2</sub>O infusion

For the 12 h infusion experiments, D<sub>2</sub>O in serum is not at steady state and accordingly a slightly more complex calculation is required. D<sub>2</sub>O increases linearly with infusion time (Sup. Fig. 1f). The final serum D<sub>2</sub>O enrichment ( $p_1$ ) can thus be written as a linear function of time:

$$p_1 = t \times k_1 \quad (5)$$

Due to the rapid H-D exchange flux, tissue NADPH labeling reaches equilibrium with serum water labeling quickly, and therefore tissue NADPH will also rise linearly over time:

$$p_2 = t \times k_2 \quad (6)$$

where:

$$k_2/k_1 = H_{\text{exchange}} \quad (7)$$

The expected deuterium per palmitate ( $E$ ) will be:

$$E = 7 \times p_1 + 14 \times p_2 = 7 \times k_1 \times t + 14 \times k_2 \times t \quad (8)$$

Define  $f$  (gram/hour) as the average *de novo* lipogenesis flux of palmitate per hour. For an infusion of duration  $t$  hours, the total deuterium amount incorporated into newly synthesized palmitate is:

$$\int f \times E dt = D \times C \quad (9)$$

$$f \times \left(\frac{7}{2} k_1 \times t^2 + 7k_2 \times t^2\right) = D \times C \quad (10)$$

$$\frac{f}{C} = \frac{D}{(3.5k_1 + 7k_2) \times t^2} \quad (11)$$

Newly synthesized palmitate (**F**) in t = 12 h is given by:

$$\frac{F}{C} = \frac{12 \times f}{C} = \frac{D}{(3.5k_1 + 7k_2) \times 12} \quad (12)$$

## 2. Quantification of direct carbon contribution from circulating substrates

The direct carbon sources for lipogenesis can be analyzed similarly to the direct circulating nutrient contribution to TCA<sup>18</sup>. Since  $F_{circ}^{18}$  of glucose, lactate and acetate are high, their labeling in serum reaches steady state within ~1 h of infusion. Saponified fatty acid labeling, however, does not reach steady state over 12 h. So, an extra factor of newly synthesized fat ( $\frac{F}{C}$  from eq 12) needs to be included.

Here, we define  $f_{pal \leftarrow Met}$  as the carbon flux directly coming from a given circulating metabolite to palmitate. By direct, we mean that the circulating metabolite is taken up into the lipogenic tissue (liver or adipose) and converted within the tissue to acetyl-CoA that is used for fat synthesis. This contrasts with circulating metabolites that are converted into a different circulating lipogenic precursor before entering the lipogenic tissue to support fat synthesis. Here, we assessed six potential lipogenic substrates: glucose (glc), lactate (lac), acetate (act), glutamine (gln), alanine (ala) and citrate (cit).

Define  $L_{Met2 \leftarrow Met1}$  as the average pseudo-steady-state <sup>13</sup>C enrichment fraction per carbon in metabolite<sub>2</sub> after infusion of U-<sup>13</sup>C- labeled metabolite<sub>1</sub> as the tracer. To calculate enrichment, let  $N_i$  be the fraction of the metabolite containing  $i$  <sup>13</sup>C atoms (after natural isotope correction) and  $n$  the total carbon number of the metabolite:

$$L_{Met} = \frac{\sum_{i=0-n} N_i \times i}{n} \quad (13)$$

$$L_{Met2 \leftarrow Met1} = \frac{L_{Met2}}{L_{Met1}} \quad (14)$$

Define the pre-steady-state <sup>13</sup>C-enrichment measured in saponified palmitate as  $L_{pal \leftarrow Met1_{12h}}$ . The expected pseudo-steady-state palmitate labeling is then given by dividing by the fraction of newly synthesized palmitate over the 12 h:

$$L_{pal \leftarrow Met1} = \frac{L_{pal \leftarrow Met1, 12h}}{F/C} \quad (15)$$

Liver is fed by 22% systemic arterial blood and 78% portal vein blood<sup>57</sup>; brown adipose tissue is fed by arterial blood<sup>53</sup>. Artery enrichment was calculated based on tail vein blood enrichment<sup>18</sup>, and portal vein enrichment was directly measured (**Sup. 2c**). We can then solve the direct carbon flux to *de novo* lipogenesis in liver and brown adipose tissue with the following equation:

$$\begin{bmatrix} 1 & L_{lac \leftarrow glc} & L_{act \leftarrow glc} & L_{gln \leftarrow glc} & L_{ala \leftarrow glc} & L_{cit \leftarrow glc} \\ L_{glc \leftarrow lac} & 1 & L_{act \leftarrow lac} & L_{gln \leftarrow lac} & L_{ala \leftarrow lac} & L_{cit \leftarrow lac} \\ L_{glc \leftarrow act} & L_{lac \leftarrow act} & 1 & L_{gln \leftarrow act} & L_{ala \leftarrow act} & L_{cit \leftarrow act} \\ L_{glc \leftarrow gln} & L_{lac \leftarrow gln} & L_{act \leftarrow gln} & 1 & L_{ala \leftarrow gln} & L_{cit \leftarrow gln} \\ L_{glc \leftarrow ala} & L_{lac \leftarrow ala} & L_{act \leftarrow ala} & L_{gln \leftarrow ala} & 1 & L_{cit \leftarrow ala} \\ L_{glc \leftarrow cit} & L_{lac \leftarrow cit} & L_{act \leftarrow cit} & L_{gln \leftarrow cit} & L_{ala \leftarrow cit} & 1 \end{bmatrix} \times \begin{bmatrix} f_{pal \leftarrow glc} \\ f_{pal \leftarrow lac} \\ f_{pal \leftarrow act} \\ f_{pal \leftarrow gln} \\ f_{pal \leftarrow ala} \\ f_{pal \leftarrow cit} \end{bmatrix} = \begin{bmatrix} L_{pal \leftarrow glc} \\ L_{pal \leftarrow lac} \\ L_{pal \leftarrow act} \\ L_{pal \leftarrow gln} \\ L_{pal \leftarrow ala} \\ L_{pal \leftarrow cit} \end{bmatrix} \quad (16)$$

### 3. Quantification of fractional NADPH contribution from different production pathways

Deuterium-labeled metabolite tracers label NADPH's active-H<sup>14</sup>. Active-H labeling in NADPH was determined from the isotopic pattern of NADPH relative to NADP<sup>+</sup> (eq 1). The fraction of NADPH coming from different pathways was calculated as described previously<sup>14</sup>:

$$\text{Fractional NADPH contribution} = \frac{\text{Active-H labeling} \times (\# \text{ NADPH made by pathway})}{\text{Substrate labeling} \times (1 - H_{\text{exchange}})} \quad (17)$$

# NADPH made by pathway is 2 for the oxidative PPP and 1 otherwise.  $H_{\text{exchange}}$  refers to the fraction of NADPH undergoing H-D exchange with water. Experimental measurements of NADPH and fat labeling after D<sub>2</sub>O infusion gave out  $H_{\text{exchange}}$  in liver and brown adipose (eq 7; Sup. Fig. 1h). Tissue glucose-6-phosphate labeling was used as substrate labeling for calculating the oxPPP contribution; tissue serine M+2 and M+3 labeling (summed) was used as substrate labeling for calculating the serine contribution. No correction was made for the deuterium kinetic isotope effect.

### Author contributions and information

Z.Z., T.T. and J.D.R. came up with the general approach and tracing strategy. Z.Z. and T.T. designed and performed all the *in vivo* and *in vitro* isotope tracing studies and other. Z.Z. conducted most of the sample preparation and data analysis. X.X. performed folate species measurement. X.Z. performed all

the acetate measurement. L.Y. contributed to *in vivo* one-carbon metabolism study. G.X., G. J. T. and M. F. C. contributed to *in vitro* tracing experiments. Z.Z., T.T., and J.D.R. wrote the manuscript with help from all authors. Correspondence and requests for materials should be addressed to J.D.R. ([joshr@princeton.edu](mailto:joshr@princeton.edu)).

### **Declaration of interests**

J.D.R. is a consultant to Pfizer and an advisor and stock owner in Colorado Research Partners, L.E.A.F. Pharmaceuticals, Rafael Pharmaceuticals, Raze Therapeutics, Kadmon Pharmaceuticals, and Agios Pharmaceuticals. J.D.R. is co-inventor of SHIN2 and related SHMT inhibitors, which have been patented by Princeton University.

### **Acknowledgement**

This work was supported by NIH Pioneer award 1DP1DK113643 and Pfizer, Inc. T.T. is supported by NIH fellowship 1F32DK118856-01A1. L.Y. was supported by a postdoctoral fellowship from the New Jersey Commission on Cancer Research. We thank Sheng (Tony) Hui, Cholsoon Jang, Li Chen, Yihui Shen, Lin Wang, Caroline Bartman and all other Rabinowitz lab members for advice.



- 1     Lehninger, A. L., Nelson, D. L. & Cox, M. M. *Lehninger principles of biochemistry*. 6th edn, (W.H. Freeman, 2013).
- 2     Chen, L. *et al.* NADPH production by the oxidative pentose-phosphate pathway supports folate metabolism. *Nat Metab* **1**, 404-415 (2019).
- 3     Postic, C. & Girard, J. Contribution of de novo fatty acid synthesis to hepatic steatosis and insulin resistance: lessons from genetically engineered mice. *J Clin Invest* **118**, 829-838, doi:10.1172/JCI34275 (2008).
- 4     Ducker, G. S. & Rabinowitz, J. D. One-Carbon Metabolism in Health and Disease. *Cell Metab* **25**, 27-42, doi:10.1016/j.cmet.2016.08.009 (2017).
- 5     Yang, M. & Vousden, K. H. Serine and one-carbon metabolism in cancer. *Nat Rev Cancer* **16**, 650-662, doi:10.1038/nrc.2016.81 (2016).
- 6     Simopoulos, A. P. Essential fatty acids in health and chronic disease. *Am J Clin Nutr* **70**, 560S-569S, doi:10.1093/ajcn/70.3.560s (1999).
- 7     KINGSBURY, K. J., PAUL, S., CROSSLEY, A. & MORGAN, D. M. The fatty acid composition of human depot fat. *Biochem J* **78**, 541-550, doi:10.1042/bj0780541 (1961).
- 8     Wadke, M., Brunengraber, H., Lowenstein, J. M., Dolhun, J. J. & Arsenault, G. P. Fatty acid synthesis by liver perfused with deuterated and tritiated water. *Biochemistry* **12**, 2619-2624 (1973).
- 9     JUNGAS, R. FATTY ACID SYNTHESIS IN ADIPOSE TISSUE INCUBATED IN TRITIATED WATER. *Biochemistry* **7**, 3708-&, doi:10.1021/bi00850a050 (1968).
- 10    SEYAMA, Y. *et al.* IDENTIFICATION OF SOURCES OF HYDROGEN-ATOMS IN FATTY-ACIDS SYNTHESIZED USING DEUTERATED WATER AND STEREOSPECIFICALLY DEUTERIUM LABELED NADPH BY GAS-CHROMATOGRAPHIC MASS-SPECTROMETRIC ANALYSIS. *Biomedical Mass Spectrometry* **5**, 357-361, doi:10.1002/bms.1200050507 (1978).
- 11    Diraison, F., Pachiadi, C. & Beylot, M. In vivo measurement of plasma cholesterol and fatty acid synthesis with deuterated water: determination of the average number of deuterium atoms incorporated. *Metabolism* **45**, 817-821 (1996).
- 12    Hellerstein, M. K. *et al.* Measurement of de novo hepatic lipogenesis in humans using stable isotopes. *J Clin Invest* **87**, 1841-1852, doi:10.1172/JCI115206 (1991).
- 13    McCabe, B. J. & Previs, S. F. Using isotope tracers to study metabolism: application in mouse models. *Metab Eng* **6**, 25-35, doi:10.1016/j.ymben.2003.09.003 (2004).
- 14    Zhang, Z., Chen, L., Liu, L., Su, X. & Rabinowitz, J. D. Chemical Basis for Deuterium Labeling of Fat and NADPH. *J Am Chem Soc* **139**, 14368-14371, doi:10.1021/jacs.7b08012 (2017).
- 15    Hellerstein, M. K. No common energy currency: de novo lipogenesis as the road less traveled. *Am J Clin Nutr* **74**, 707-708, doi:10.1093/ajcn/74.6.707 (2001).
- 16    Lambert, J. E., Ramos-Roman, M. A., Browning, J. D. & Parks, E. J. Increased de novo lipogenesis is a distinct characteristic of individuals with nonalcoholic fatty liver disease. *Gastroenterology* **146**, 726-735, doi:10.1053/j.gastro.2013.11.049 (2014).
- 17    Hellerstein, M. K., Schwarz, J. M. & Neese, R. A. Regulation of hepatic de novo lipogenesis in humans. *Annu Rev Nutr* **16**, 523-557, doi:10.1146/annurev.nu.16.070196.002515 (1996).
- 18    Hui, S. *et al.* Glucose feeds the TCA cycle via circulating lactate. *Nature* **551**, 115-118, doi:10.1038/nature24057 (2017).
- 19    Zhao, S. *et al.* ATP-Citrate Lyase Controls a Glucose-to-Acetate Metabolic Switch. *Cell Rep* **17**, 1037-1052, doi:10.1016/j.celrep.2016.09.069 (2016).
- 20    Wellen, K. E. & Thompson, C. B. A two-way street: reciprocal regulation of metabolism and signalling. *Nat Rev Mol Cell Biol* **13**, 270-276, doi:10.1038/nrm3305 (2012).
- 21    Mashimo, T. *et al.* Acetate is a bioenergetic substrate for human glioblastoma and brain metastases. *Cell* **159**, 1603-1614, doi:10.1016/j.cell.2014.11.025 (2014).

- 22 Schug, Z. T. *et al.* Acetyl-CoA synthetase 2 promotes acetate utilization and maintains cancer cell growth under metabolic stress. *Cancer Cell* **27**, 57-71, doi:10.1016/j.ccell.2014.12.002 (2015).
- 23 Faubert, B. *et al.* Lactate Metabolism in Human Lung Tumors. *Cell* **171**, 358-371.e359, doi:10.1016/j.cell.2017.09.019 (2017).
- 24 Nelson, M. E. *et al.* Inhibition of hepatic lipogenesis enhances liver tumorigenesis by increasing antioxidant defence and promoting cell survival. *Nat Commun* **8**, 14689, doi:10.1038/ncomms14689 (2017).
- 25 Tasdogan, A. *et al.* Metabolic heterogeneity confers differences in melanoma metastatic potential. *Nature* **577**, 115-120, doi:10.1038/s41586-019-1847-2 (2020).
- 26 Fan, J. *et al.* Quantitative flux analysis reveals folate-dependent NADPH production. *Nature* **510**, 298-302, doi:10.1038/nature13236 (2014).
- 27 Lewis, C. A. *et al.* Tracing compartmentalized NADPH metabolism in the cytosol and mitochondria of mammalian cells. *Mol Cell* **55**, 253-263, doi:10.1016/j.molcel.2014.05.008 (2014).
- 28 Uhlén, M. *et al.* Proteomics. Tissue-based map of the human proteome. *Science* **347**, 1260419, doi:10.1126/science.1260419 (2015).
- 29 Liu, L. *et al.* Malic enzyme tracers reveal hypoxia-induced switch in adipocyte NADPH pathway usage. *Nat Chem Biol* **12**, 345-352, doi:10.1038/nchembio.2047 (2016).
- 30 Metallo, C. M. *et al.* Reductive glutamine metabolism by IDH1 mediates lipogenesis under hypoxia. *Nature* **481**, 380-384, doi:10.1038/nature10602 (2011).
- 31 Piskounova, E. *et al.* Oxidative stress inhibits distant metastasis by human melanoma cells. *Nature* **527**, 186-191, doi:10.1038/nature15726 (2015).
- 32 Davidson, S. M. *et al.* Environment Impacts the Metabolic Dependencies of Ras-Driven Non-Small Cell Lung Cancer. *Cell Metab* **23**, 517-528, doi:10.1016/j.cmet.2016.01.007 (2016).
- 33 MacFarlane, A. J. *et al.* Cytoplasmic serine hydroxymethyltransferase regulates the metabolic partitioning of methylenetetrahydrofolate but is not essential in mice. *J Biol Chem* **283**, 25846-25853, doi:10.1074/jbc.M802671200 (2008).
- 34 Ducker, G. S. *et al.* Reversal of Cytosolic One-Carbon Flux Compensates for Loss of the Mitochondrial Folate Pathway. *Cell Metab* **24**, 640-641, doi:10.1016/j.cmet.2016.09.011 (2016).
- 35 Ducker, G. S. *et al.* Human SHMT inhibitors reveal defective glycine import as a targetable metabolic vulnerability of diffuse large B-cell lymphoma. *Proc Natl Acad Sci U S A* **114**, 11404-11409, doi:10.1073/pnas.1706617114 (2017).
- 36 Beaudin, A. E. *et al.* Shmt1 and de novo thymidylate biosynthesis underlie folate-responsive neural tube defects in mice. *Am J Clin Nutr* **93**, 789-798, doi:10.3945/ajcn.110.002766 (2011).
- 37 Meiser, J. *et al.* Serine one-carbon catabolism with formate overflow. *Sci Adv* **2**, e1601273, doi:10.1126/sciadv.1601273 (2016).
- 38 Zheng, Y. *et al.* Mitochondrial One-Carbon Pathway Supports Cytosolic Folate Integrity in Cancer Cells. *Cell* **175**, 1546-1560.e1517, doi:10.1016/j.cell.2018.09.041 (2018).
- 39 Appling, D. R. Compartmentation of folate-mediated one-carbon metabolism in eukaryotes. *FASEB J* **5**, 2645-2651, doi:10.1096/fasebj.5.12.1916088 (1991).
- 40 Barlowe, C. K. & Appling, D. R. In vitro evidence for the involvement of mitochondrial folate metabolism in the supply of cytoplasmic one-carbon units. *Biofactors* **1**, 171-176 (1988).
- 41 Mullarky, E. *et al.* Inhibition of 3-phosphoglycerate dehydrogenase (PHGDH) by indole amides abrogates de novo serine synthesis in cancer cells. *Bioorg Med Chem Lett* **29**, 2503-2510, doi:10.1016/j.bmcl.2019.07.011 (2019).
- 42 Pacold, M. E. *et al.* A PHGDH inhibitor reveals coordination of serine synthesis and one-carbon unit fate. *Nat Chem Biol* **12**, 452-458, doi:10.1038/nchembio.2070 (2016).

- 43 Locasale, J. W. Serine, glycine and one-carbon units: cancer metabolism in full circle. *Nat Rev Cancer* **13**, 572-583, doi:10.1038/nrc3557 (2013).
- 44 Ye, J. *et al.* Serine catabolism regulates mitochondrial redox control during hypoxia. *Cancer Discov* **4**, 1406-1417, doi:10.1158/2159-8290.CD-14-0250 (2014).
- 45 Svensson, R. U. *et al.* Inhibition of acetyl-CoA carboxylase suppresses fatty acid synthesis and tumor growth of non-small-cell lung cancer in preclinical models. *Nat Med* **22**, 1108-1119, doi:10.1038/nm.4181 (2016).
- 46 Esler, W. P. & Bence, K. K. Metabolic Targets in Nonalcoholic Fatty Liver Disease. *Cell Mol Gastroenterol Hepatol* **8**, 247-267, doi:10.1016/j.jcmgh.2019.04.007 (2019).
- 47 Kim, C. W. *et al.* Acetyl CoA Carboxylase Inhibition Reduces Hepatic Steatosis but Elevates Plasma Triglycerides in Mice and Humans: A Bedside to Bench Investigation. *Cell Metab* **26**, 576, doi:10.1016/j.cmet.2017.08.011 (2017).
- 48 Goedeke, L. *et al.* Acetyl-CoA Carboxylase Inhibition Reverses NAFLD and Hepatic Insulin Resistance but Promotes Hypertriglyceridemia in Rodents. *Hepatology* **68**, 2197-2211, doi:10.1002/hep.30097 (2018).
- 49 Chondronikola, M. *et al.* Brown adipose tissue improves whole-body glucose homeostasis and insulin sensitivity in humans. *Diabetes* **63**, 4089-4099, doi:10.2337/db14-0746 (2014).
- 50 Stanford, K. I. *et al.* Brown adipose tissue regulates glucose homeostasis and insulin sensitivity. *J Clin Invest* **123**, 215-223, doi:10.1172/JCI62308 (2013).
- 51 Benson, K. K. *et al.* Natural human genetic variation determines basal and inducible expression of. *Proc Natl Acad Sci U S A* **116**, 23232-23242, doi:10.1073/pnas.1913199116 (2019).
- 52 Rong, X. *et al.* LXRs regulate ER stress and inflammation through dynamic modulation of membrane phospholipid composition. *Cell Metab* **18**, 685-697, doi:10.1016/j.cmet.2013.10.002 (2013).
- 53 Jang, C. *et al.* Metabolite Exchange between Mammalian Organs Quantified in Pigs. *Cell Metab*, doi:10.1016/j.cmet.2019.06.002 (2019).
- 54 Chen, L., Ducker, G. S., Lu, W., Teng, X. & Rabinowitz, J. D. An LC-MS chemical derivatization method for the measurement of five different one-carbon states of cellular tetrahydrofolate. *Anal Bioanal Chem* **409**, 5955-5964, doi:10.1007/s00216-017-0514-4 (2017).
- 55 Melamud, E., Vastag, L. & Rabinowitz, J. D. Metabolomic analysis and visualization engine for LC-MS data. *Anal Chem* **82**, 9818-9826, doi:10.1021/ac1021166 (2010).
- 56 Su, X., Lu, W. & Rabinowitz, J. D. Metabolite Spectral Accuracy on Orbitraps. *Anal Chem*, doi:10.1021/acs.analchem.7b00396 (2017).
- 57 Eipel, C., Abshagen, K. & Vollmar, B. Regulation of hepatic blood flow: the hepatic arterial buffer response revisited. *World J Gastroenterol* **16**, 6046-6057, doi:10.3748/wjg.v16.i48.6046 (2010).

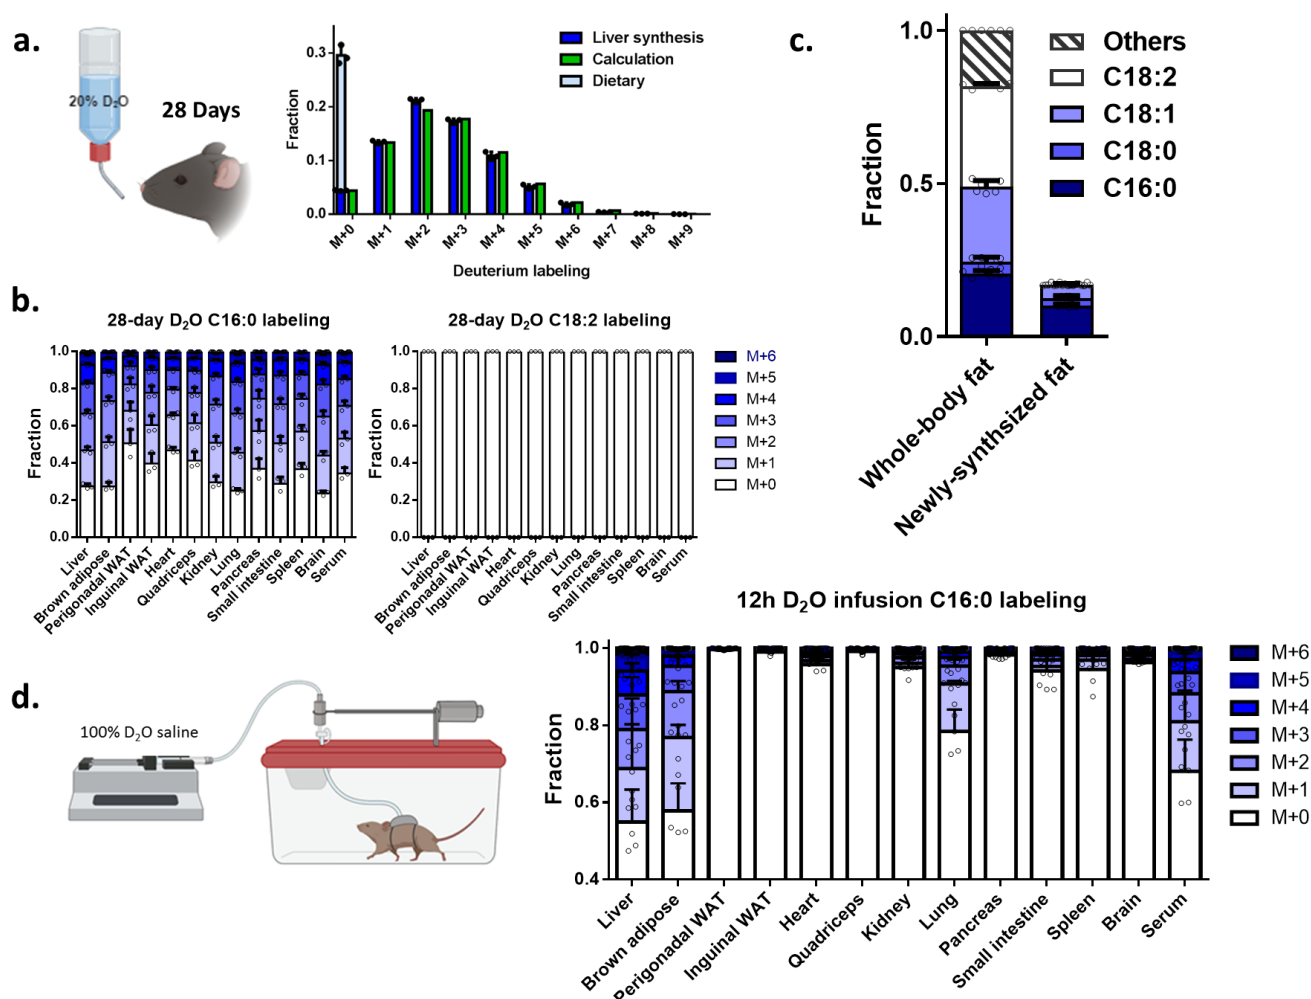

**Figure 1. *De novo* lipogenesis in liver and brown adipose produces much of whole-body saturated fat**

- Liver palmitate (C16:0) labeling pattern after 4 weeks of D<sub>2</sub>O drinking. Left bars (blue) reflect the experimentally observed labeling; right bars (green) reflect the calculated labeling based on fraction of newly synthesized fat and observed D<sub>2</sub>O and NADPH labeling. Fraction dietary versus synthesized fat is based on fitting the labeling pattern. Throughout the manuscript, all data are for saponified fatty acids.
  - Palmitate (C16:0) and linoleate (C18:2) labeling pattern across tissues after 4 weeks D<sub>2</sub>O drinking. C18:2 is an essential fatty acid and accordingly shows no labeling.
  - Composition of whole-body fat (left) and fraction that is endogenously synthesized based on the 4-week D<sub>2</sub>O drinking data (right).
  - C16:0 labeling pattern across tissues after 12 h fed-state D<sub>2</sub>O infusion.
- Mean  $\pm$  s.d., n=6 mice for composition analysis; n=3 for D<sub>2</sub>O drinking experiment and n=5 for 12h D<sub>2</sub>O infusion.

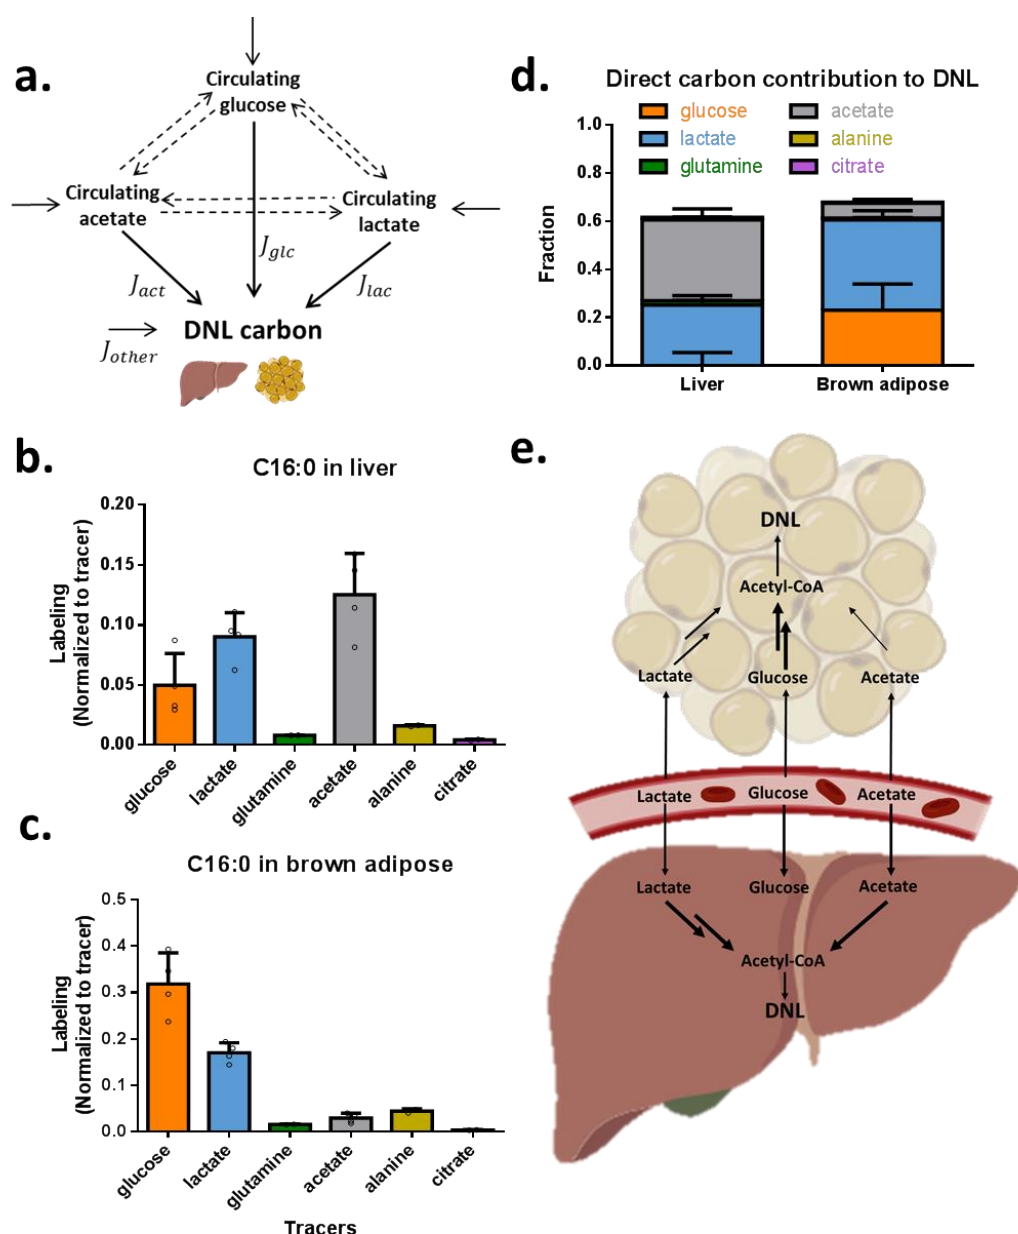

**Figure 2. Liver and brown adipose use different carbon sources to support lipogenesis**

- Isotope tracing into fat is complicated by interconversion of the tracer with other circulating metabolites. By conducting tracer experiments with all key circulating substrates, the direct contribution of each can be determined by linear algebra.
  - Fractional enrichment of liver C16:0 following 12 h infusion of [U-<sup>13</sup>C]-labeled glucose (n=4), lactate (n=4), glutamine (n=2), acetate (n=4), alanine (n=2) and citrate (n=2). Labeling is normalized to circulating tracer enrichment.
  - As in (b), for brown adipose C16:0.
  - Carbon sources supporting *de novo* lipogenesis in liver and brown adipose, based on direct contributions to C16:0, calculated based on data in (b) and (c).
  - Schematic of differential lipogenic substrate use by liver versus brown adipose.
- All data are mean  $\pm$  s.d.

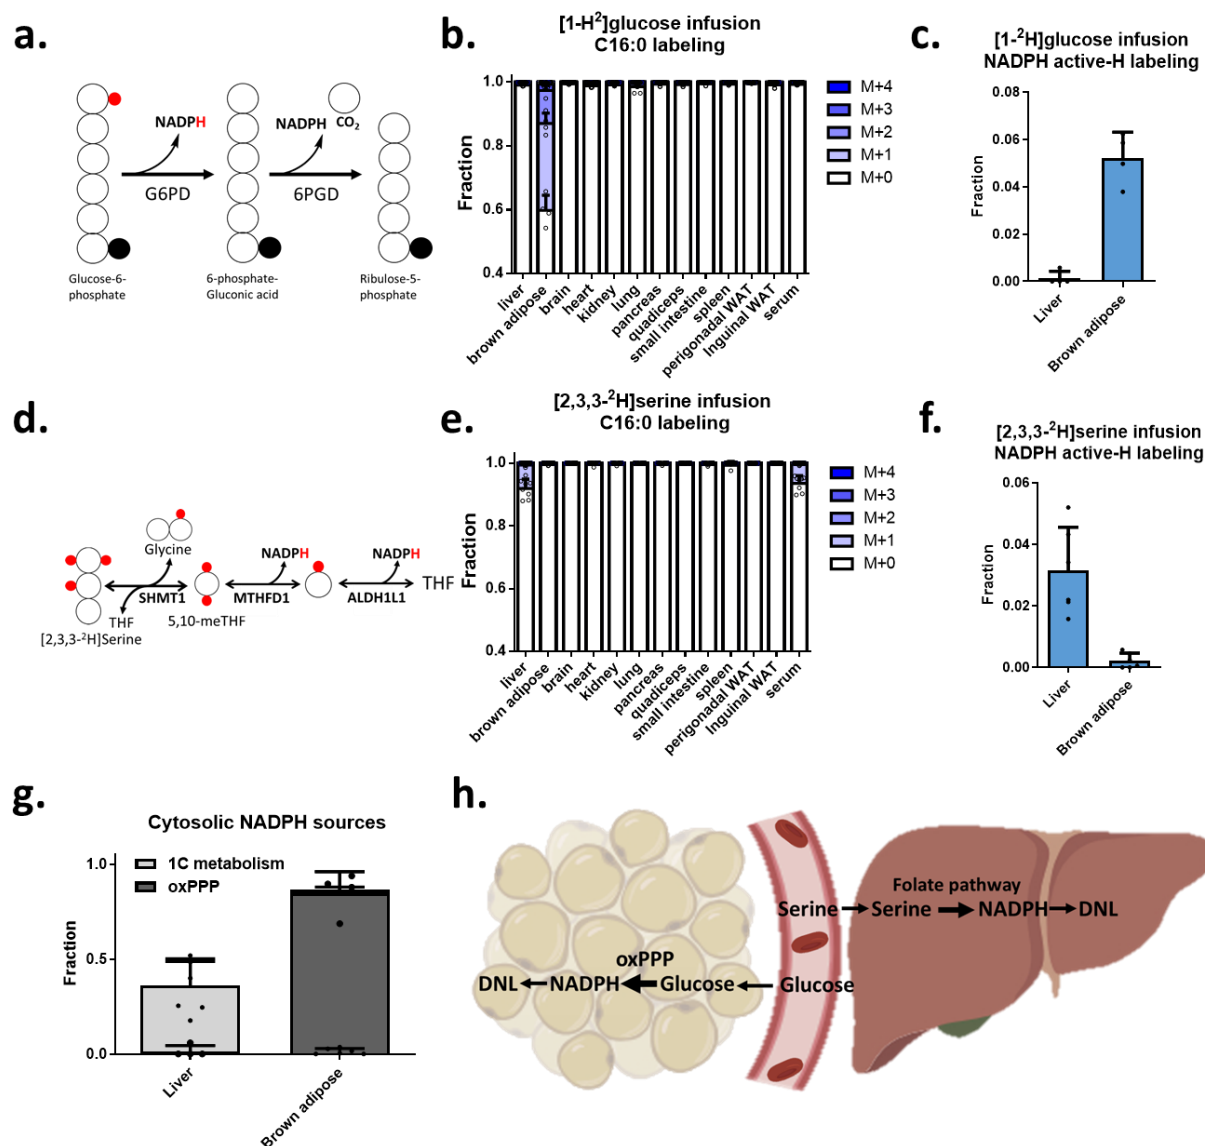

**Figure 3. Brown adipose generates lipogenic NADPH via the oxPPP while liver uses serine catabolism**

- Schematic of pathway by which  $[1-^2\text{H}]$ glucose and  $[3-^2\text{H}]$ glucose labels NADPH via the oxPPP.
- C16:0 labeling across tissues following 12 h  $[1-^2\text{H}]$ glucose infusion.
- NADPH active-H measurement in liver and brown adipose from 12 h  $[1-^2\text{H}]$ glucose infusion.
- Schematic of pathway by which  $[2,3,3-^2\text{H}]$ serine labels NADPH via cytosolic folate metabolism.
- As is (b), for 12 h  $[2,3,3-^2\text{H}]$ serine infusion.
- As is (c), for 12 h  $[2,3,3-^2\text{H}]$ serine infusion.
- Hydride sources supporting *de novo* lipogenesis in liver and brown adipose, correcting for substrate labeling and H-D exchange between NADPH and water. Calculated based on tracer data in (c) and (f) and  $\text{D}_2\text{O}$  exchange data in Supplementary Fig.1i.

h. Schematic of differential lipogenic substrate use by liver versus brown adipose.  
Mean  $\pm$  s.d., n=4 mice for [1-<sup>2</sup>H]glucose infusion; n=7 mice for [2,3,3-<sup>2</sup>H]serine infusion liver, brown adipose and serum; n=4 for other tissues.



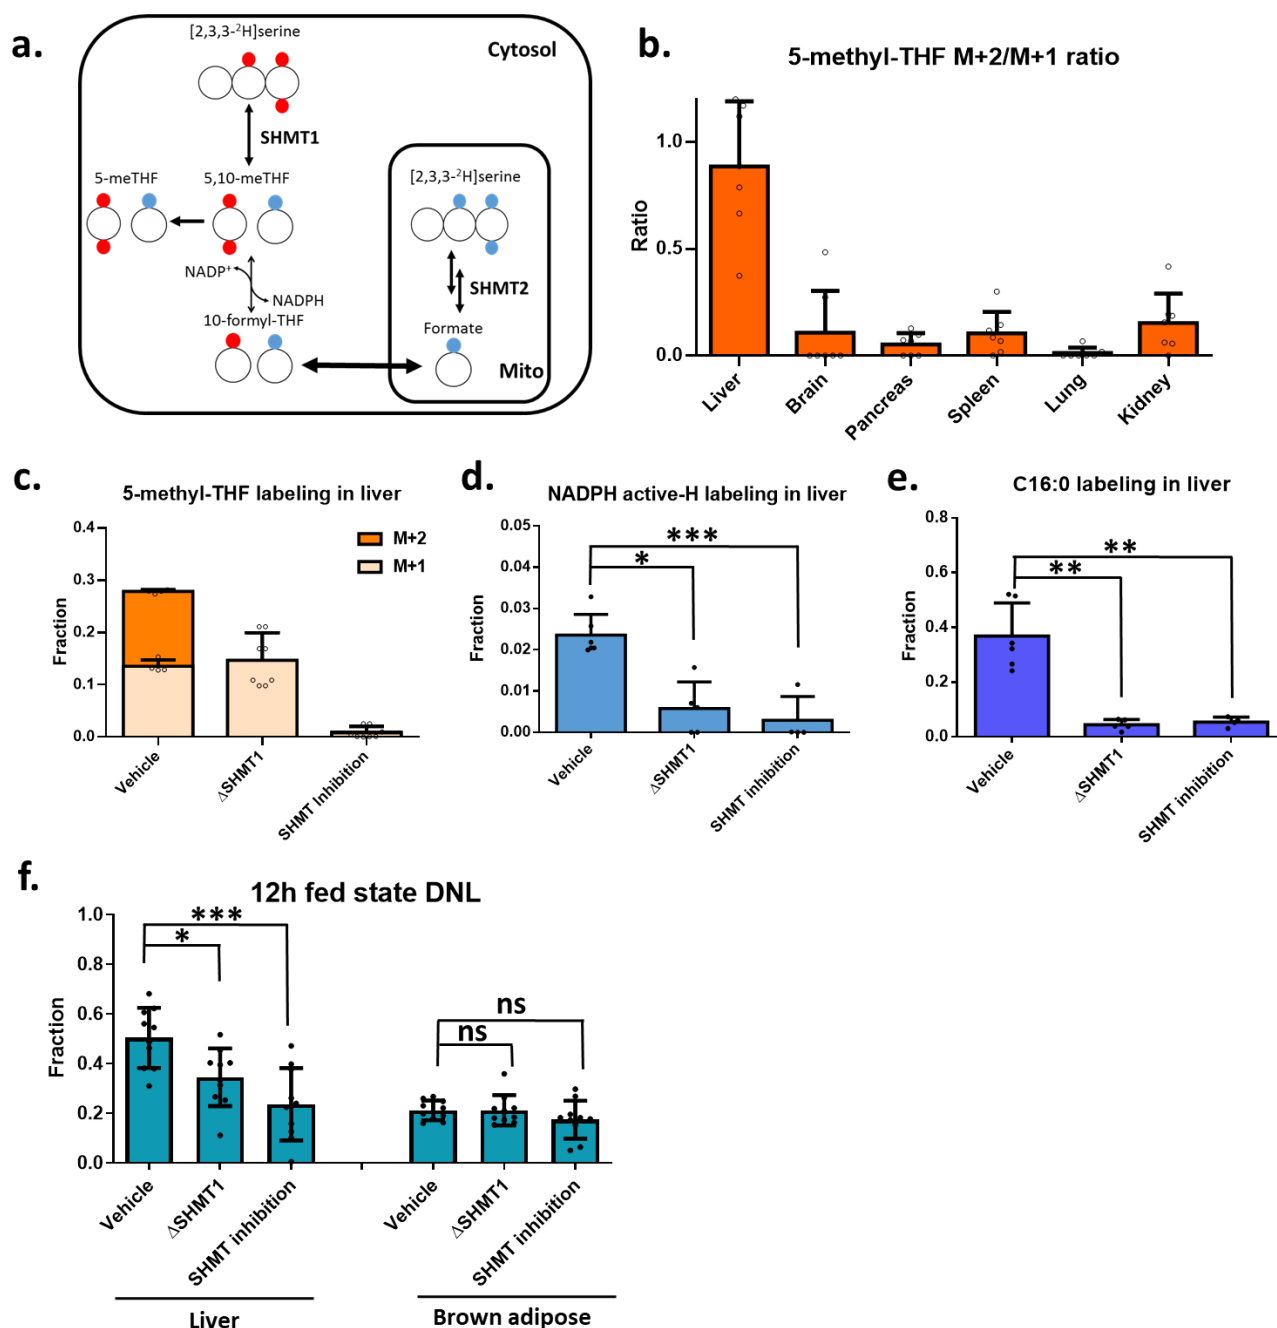

**Figure 4. Liver serine catabolism generates NADPH via SHMT1-MTHFD1-ALDH1L1 and thereby supports hepatic lipogenesis.**

- a. Schematic of the cytosolic and mitochondrial serine catabolic pathways. Metabolite labeling from [2,3,3-<sup>2</sup>H]serine generated by the cytosolic pathway is shown in red and mitochondrial pathway in blue.
- b. 5-methyl-THF labeling for 12 h [2,3,3-<sup>2</sup>H]serine infusion. Ratio of M+2 to M+1 labeling reflects relative contribution of cytosolic versus mitochondrial serine catabolism to 1C units in 5-methyl-THF.



- c. 5-methyl-THF labeling in liver for 12 h [2,3,3-<sup>2</sup>H]serine infusion in control, whole-body  $\Delta$ SHMT1 mice, and mice treated with the dual SHMT1/2 inhibitor SHIN2 (3.33 mg/kg/h i.v. infusion).
- d. NADPH active-H measurement in liver for 12 h [2,3,3-<sup>2</sup>H]serine infusion (vehicle vs  $\Delta$ SHMT1,  $p=0.017$ ; vehicle VS SHIN2 treatment,  $p=0.003$ )
- e. C16:0 labeling in liver for 12 h [2,3,3-<sup>2</sup>H]serine infusion. Labeling is normalized to liver serine enrichment and reported as the average number of labeled hydrogens in C16:0. (vehicle VS  $\Delta$ SHMT1,  $p=0.004$ ; vehicle vs SHIN2 treatment,  $p=0.01$ )
- f. C16:0 fraction that is newly synthesized in liver and brown adipose overnight, as measured by 12 h D<sub>2</sub>O infusion. (In liver, vehicle VS  $\Delta$ SHMT1,  $p=0.028$ ; vehicle VS SHIN2 treatment,  $p<0.001$ ; in brown adipose, vehicle VS  $\Delta$ SHMT1,  $p=0.98$ ; vehicle VS SHIN2 treatment,  $p=0.19$ )

Mean  $\pm$  s.d. For serine, N=6 for wild type, N=4 for  $\Delta$ SHMT1, N=4 for SHIN2 treatment. For D<sub>2</sub>O infusion, N=10 for all 3 conditions. n.s.,  $P>0.05$ ; asterisk,  $P<0.05$ ; two asterisks,  $P<0.01$ ; three asterisks,  $P<0.005$ .
